# Supplementary material
Source: MDPI journal article supplement (https://www.mdpi.com/2504-477X/5/5/136)
Supplement: s1 [file s1 › jcs-1197888-supplementary.pdf]

## Supporting Materials

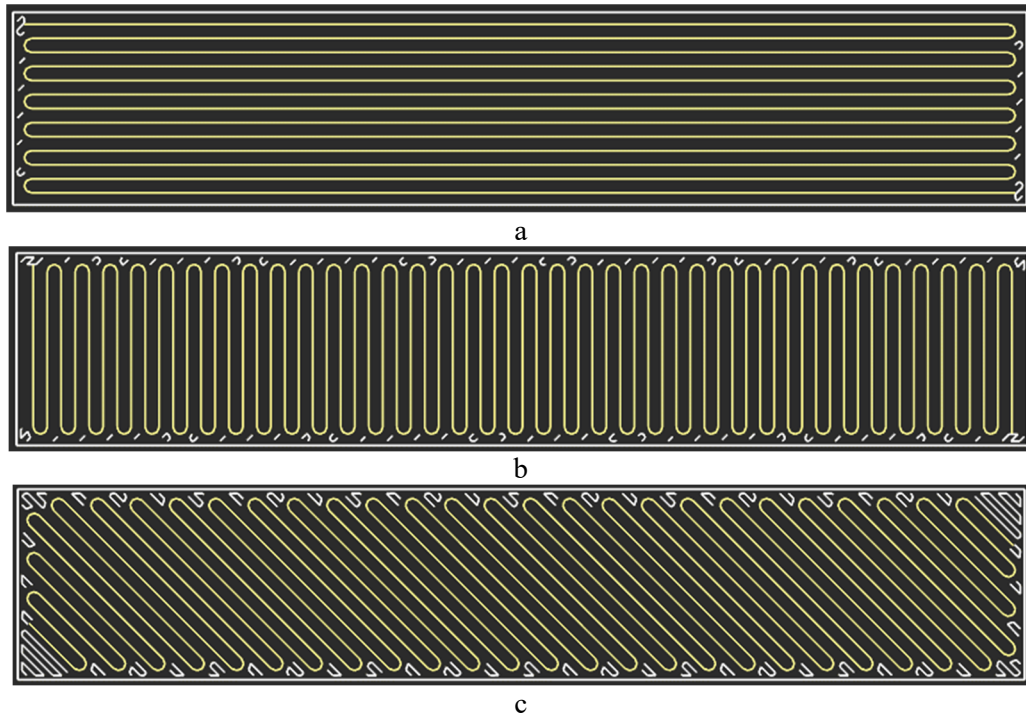

Figure 1. Fiber and plastic paths for different layers with different fiber orientations (availed from the slicer, Eiger of Izod impact specimen with 63.5 mm x 12.7 mm dimension); (a) 0° layer (b) 90° layer and (c) 45° layer.

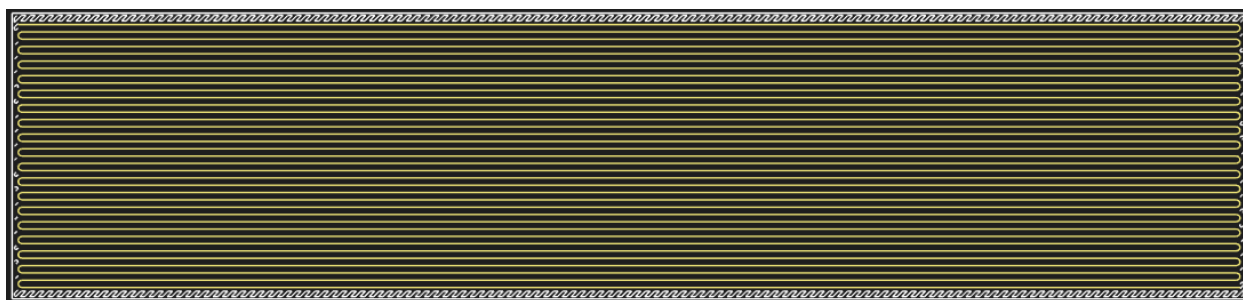

a

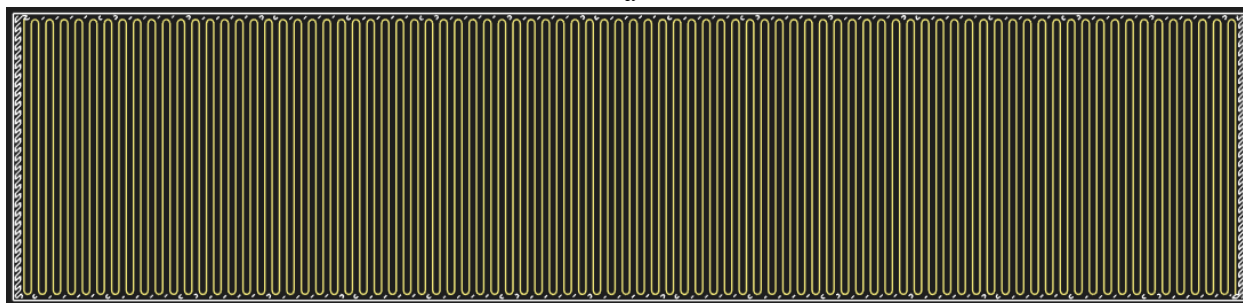

b

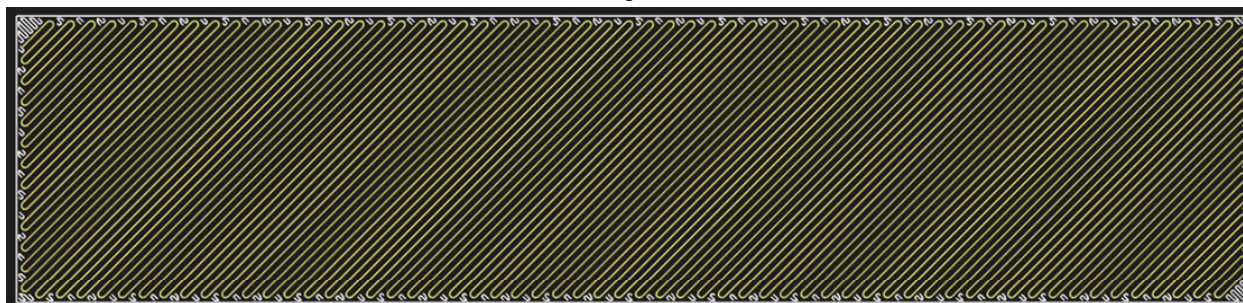

c

Figure S2: Fiber and plastic paths for different layers with different fiber orientations (availed from the slicer, Eiger of tensile sample with 152.4 mm x 35.6 mm dimension); (a)  $0^\circ$  layer (b)  $90^\circ$  layer and (c)  $45^\circ$  layer.

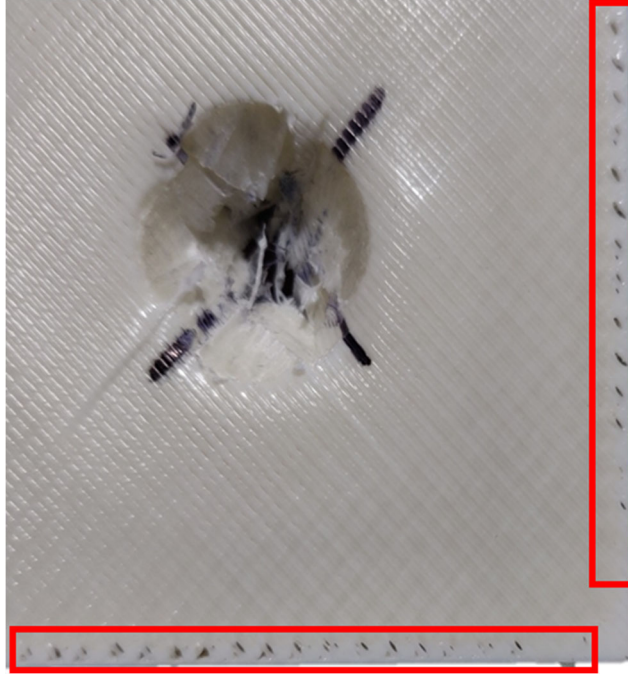

Figure S3: Voids (red marked) between wall and infill rasters. These voids are generated when the infill rasters do not completely cover the whole area (as raster density is fixed) or using 1 wall layer (as Eiger slicer recommends using two wall layers to obtain watertight surface finish).

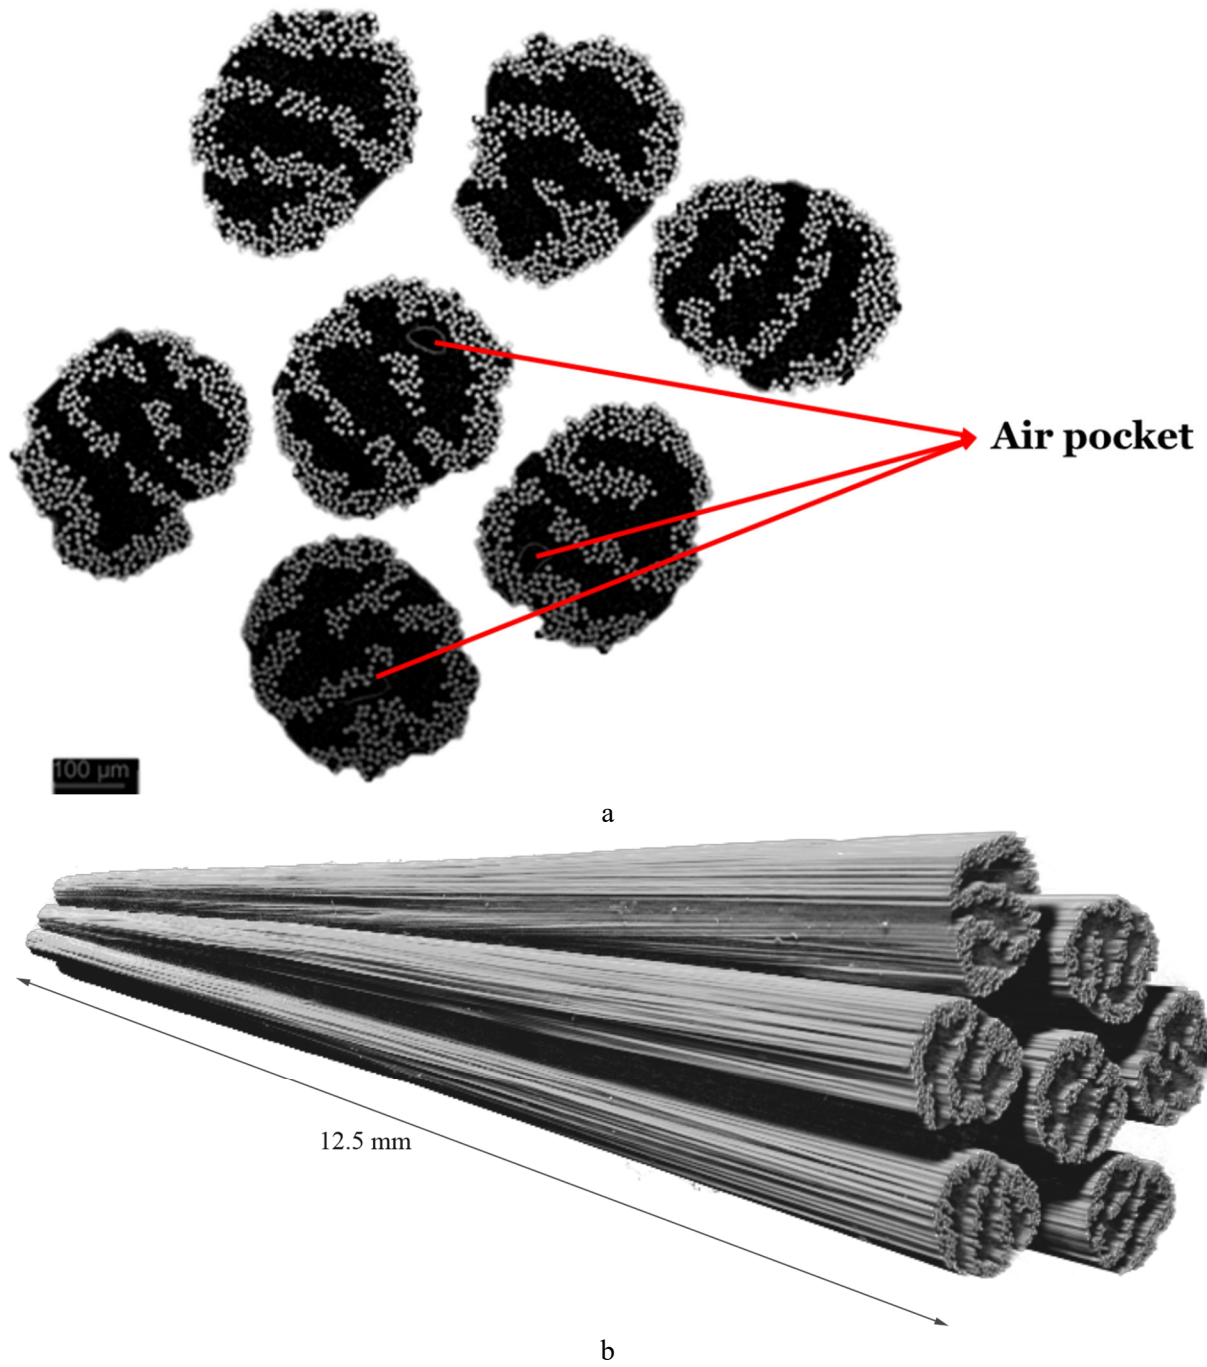

Figure S4: Internal structure of composite filament; (a) cross-section showing dark background, white dots, and air pocket representing matrix (Nylon 6), fiberglass filament and void, respectively; (b) 3D longitudinal view of fiber in the composite filament exhibiting fibers are pretty straight. Additionally, the X-ray tomography analysis measured fiber content of approximately 33% (with approximately 10 μm diameter of individual filament), which are in agreement with the authors' previous finding in [3]. Here, the authors followed the fiber content value obtained by thermal analysis (approximately 38%).

Table S1: Tensile properties of 3DOW (sample 28 from Midani et al. [28])) and 3DP (sample 0/0) composites

| Attributes                                |                                                        | 3DOW                                                        | 3DP                       |
|-------------------------------------------|--------------------------------------------------------|-------------------------------------------------------------|---------------------------|
| Composite properties                      | Matrix tensile strength, MPa                           | 76                                                          | 54                        |
|                                           | Fiber tensile strength, MPa                            | 2230 (both X and Y) <sup>a</sup>                            | 590                       |
|                                           | Composite areal weight, kg/m <sup>2</sup>              | 5                                                           | 4.25                      |
|                                           | Fiber areal weight, kg/m <sup>2</sup>                  | 1.6841475 (Y-yarn)<br>1.697875 (X-yarn)                     | 2.028405                  |
|                                           | FVF, %                                                 | 22.5 (Y-yarn)<br>23.5 (X-yarn)                              | 31.5                      |
|                                           | Composite thickness, mm                                | 2.89                                                        | 3 mm                      |
| Tensile strength of composites            | Tensile strength of composites, MPa                    | 382 (Y-direction, Warp)<br>347 (X-direction, Filling) *     | 392 (0/0, test direction) |
| Normalized tensile strength of composites | By composite areal weight, MPa/kg/m <sup>2</sup>       | 76.4 (Y-direction, Warp)<br>68.4 (X-direction, Filling)     | 92.23                     |
|                                           | By fiber content (areal weight), MPa/kg/m <sup>2</sup> | 227 (Y-direction, Warp)<br>204 (X-direction, Filling)       | 193.255                   |
|                                           | By fiber content (FVF), MPa/FVF                        | 17.97 (Y-direction, Warp)<br>14.77 (X-direction, Filling)   | 12.44                     |
|                                           | By thickness, MPa/mm                                   | 132.18 (Y-direction, Warp)<br>120.07 (X-direction, Filling) | 130.66                    |

<sup>a</sup>Hybrid Anisotropic Materials for Wind Power Turbine Blades (Page 61) and

[https://www.900gpa.com/en/product/fiber/GF\\_009729965F?u=metric](https://www.900gpa.com/en/product/fiber/GF_009729965F?u=metric)

[https://www.900gpa.com/en/product/fiber/GF\\_00C1F65E75?u=metric](https://www.900gpa.com/en/product/fiber/GF_00C1F65E75?u=metric)

\*Comparison of 3DP with 3DOW composite in X-direction is more reasonable as Y-direction has some effect of Z-yarn.

Table S2: Comparison of tensile and impact properties between authors present and previous research [16]

| Attributes of composites                 |                                                      | Tensile sample             |                                         | Impact sample               |                                          |
|------------------------------------------|------------------------------------------------------|----------------------------|-----------------------------------------|-----------------------------|------------------------------------------|
|                                          |                                                      | This paper (0/0 composite) | Previous research (S0/0 composite [18]) | This paper (0/90 composite) | Previous research (S0/90 composite) [17] |
| Composite properties                     | Thickness, mm                                        | 3                          | 3                                       | 3                           | 3                                        |
|                                          | Number of fiber layers                               | 28                         | 8                                       | 28                          | 8                                        |
|                                          | Composite areal weight, kg/m <sup>2</sup>            | 4.25                       | 3.64                                    | 4.03                        | 3.55                                     |
|                                          | Fiber areal weight, kg/m <sup>2</sup>                | 2.03                       | 0.583                                   | 2.07                        | 0.565                                    |
|                                          | FVF, %                                               | 31.5                       | 8.94                                    | 32                          | 8.75                                     |
| Tensile and impact properties            | Tensile strength (in MPa) and impact energy (in J)   | 392                        | 225                                     | 99.2                        | 29                                       |
| Normalized tensile and impact properties | By composite areal weight, J/kg/m <sup>2</sup>       | 92.23                      | 61.81                                   | 24.62                       | 8.17                                     |
|                                          | By fiber content (areal weight), J/kg/m <sup>2</sup> | 193.255                    | 386                                     | 47.93                       | 51.327                                   |
|                                          | By fiber content (FVF), J/FVF                        | 12.44                      | 25.16                                   | 3.1                         | 3.31                                     |
